# Supplementary material for: Causal Analysis and Prevention Measures for Extreme Heavy Rainstorms in Zhengzhou to Protect Human Health
Source: MDPI journal article supplement (doi:10.3390/bs12060176), 2022-06-02
Supplement: s1 [file s1]

The minimal cut sets of flood disaster were shown as follows.

$\{X_1, X_{10}\}, \{X_1, X_{11}\}, \{X_1, X_{12}\}, \{X_1, X_{13}\}, \{X_1, X_6\}, \{X_1, X_7\}, \{X_1, X_8\}, \{X_1, X_9\}, \{X_2, X_3, X_{10}\}, \{X_2, X_3, X_{11}\}, \{X_2, X_3, X_{12}\}, \{X_2, X_3, X_{13}\}, \{X_2, X_3, X_6\}, \{X_2, X_3, X_7\}, \{X_2, X_3, X_8\}, \{X_2, X_3, X_9\}, \{X_2, X_4, X_5, X_{10}\}, \{X_2, X_4, X_5, X_{11}\}, \{X_2, X_4, X_5, X_{12}\}, \{X_2, X_4, X_5, X_{13}\}, \{X_2, X_4, X_5, X_6\}, \{X_2, X_4, X_5, X_7\}, \{X_2, X_4, X_5, X_8\}, \{X_2, X_4, X_5, X_9\}.$

The minimal path sets of flood disaster were shown as follows.

$\{X_1, X_2\}, \{X_1, X_3, X_4\}, \{X_1, X_3, X_5\}, \{X_6, X_7, X_8, X_9, X_{10}, X_{11}, X_{12}, X_{13}\}.$
